# Supplementary material
Source: bioRxiv or medRxiv preprint supplement (https://www.biorxiv.org/highwire/filestream/113612/field_highwire_adjunct_files/7/374553-8.pdf)
Supplement: Supplementary file [file 374553-8.pdf]

**Table S7.** Significant results obtained in the gene-based meta-analysis of cocaine dependence and attention deficit/hyperactivity disorder (ADHD)

| EntrezID      | Gene symbol   | CHR      | START           | STOP            | NSNPS      | N            | ZSTAT       | Combined P-value | P-value ADHD    | P-value COCA    |
|---------------|---------------|----------|-----------------|-----------------|------------|--------------|-------------|------------------|-----------------|-----------------|
| 6487          | ST3GAL3       | 1        | 44173204        | 44396837        | 518        | 59056        | 6.86        | 3.36E-12         | 5.82E-12        | 8.41E-02        |
| 9682          | KDM4A         | 1        | 44115797        | 44171189        | 74         | 59115        | 6.38        | 8.97E-11         | 3.66E-11        | 2.53E-01        |
| 5792          | PTPRF         | 1        | 43991708        | 44089343        | 240        | 59077        | 5.92        | 1.64E-09         | 5.42E-10        | 3.19E-01        |
| 7075          | TIE1          | 1        | 43766566        | 43788781        | 32         | 58177        | 5.90        | 1.85E-09         | 2.01E-08        | 1.51E-02        |
| 1006          | CDH8          | 16       | 61681169        | 62070939        | 835        | 59057        | 5.83        | 2.77E-09         | 1.09E-08        | 4.93E-02        |
| 80031         | SEMA6D        | 15       | 47476403        | 48066420        | 1540       | 59060        | 5.81        | 3.16E-09         | 3.83E-10        | 5.11E-01        |
| 4352          | MPL           | 1        | 43803475        | 43820135        | 13         | 59604        | 5.51        | 1.75E-08         | 4.79E-08        | 7.43E-02        |
| 4126          | MANBA         | 4        | 103552643       | 103682151       | 216        | 58893        | 5.51        | 1.76E-08         | 6.82E-08        | 5.18E-02        |
| 22986         | SORCS3        | 10       | 106400859       | 107024993       | 1864       | 59340        | 5.48        | 2.15E-08         | 5.24E-09        | 4.19E-01        |
| 23334         | SZT2          | 1        | 43855556        | 43919918        | 88         | 58521        | 5.42        | 2.91E-08         | 1.29E-08        | 3.11E-01        |
| 991           | CDC20         | 1        | 43824626        | 43828874        | 6          | 57440        | 5.38        | 3.66E-08         | 6.34E-08        | 1.15E-01        |
| 4208          | MEF2C         | 5        | 88014058        | 88199922        | 344        | 58906        | 5.32        | 5.17E-08         | 7.87E-08        | 1.33E-01        |
| 1848          | DUSP6         | 12       | 89741837        | 89746296        | 21         | 59291        | 5.26        | 7.24E-08         | 2.24E-09        | 8.06E-01        |
| 6536          | SLC6A9        | 1        | 44462155        | 44497171        | 64         | 55667        | 5.05        | 2.21E-07         | 9.49E-07        | 4.70E-02        |
| 55367         | PIDD1         | 11       | 799179          | 809872          | 31         | 55077        | 4.95        | 3.69E-07         | 5.30E-07        | 1.46E-01        |
| <b>386724</b> | <b>AMIGO3</b> | <b>3</b> | <b>49754267</b> | <b>49757238</b> | <b>1</b>   | <b>59670</b> | <b>4.93</b> | <b>4.03E-07</b>  | <b>1.97E-05</b> | <b>6.70E-04</b> |
| 64834         | ELOVL1        | 1        | 43829068        | 43833745        | 4          | 51706        | 4.92        | 4.24E-07         | 1.26E-06        | 7.24E-02        |
| 149473        | CCDC24        | 1        | 44457280        | 44462200        | 8          | 58973        | 4.89        | 5.13E-07         | 2.12E-06        | 4.92E-02        |
| <b>8927</b>   | <b>BSN</b>    | <b>3</b> | <b>49591922</b> | <b>49708982</b> | <b>162</b> | <b>59054</b> | <b>4.88</b> | <b>5.42E-07</b>  | <b>1.85E-05</b> | <b>1.38E-03</b> |
| 81888         | HYI           | 1        | 43916674        | 43919938        | 6          | 56506        | 4.78        | 8.81E-07         | 3.28E-07        | 4.09E-01        |
| 93986         | FOXP2         | 7        | 113726365       | 114333827       | 914        | 58176        | 4.54        | 2.80E-06         | 1.25E-06        | 3.96E-01        |

\*Gene coordinates based on GRCh37/hg19. NSNPs: Number of SNPs per region included in the gene-based analysis. N: Number of individuals considered in the analysis. ZSTAT: the Z-value for the gene. Combined P: p-value obtained in the gene-based meta-analysis of cocaine dependence and ADHD. P ADHD/COCA: p-value of the gene-based in ADHD/COCA sample alone. In bold, new associated genes.

**Table S8.** Significant results in the gene-based meta-analysis of cocaine dependence and schizophrenia (SCZ)

| EntrezID | Gene symbol | CHR | START     | STOP      | NSNPS | N      | ZSTAT | Combined P-value | P-value SCZ | P-value COCA |
|----------|-------------|-----|-----------|-----------|-------|--------|-------|------------------|-------------|--------------|
| 8368     | HIST1H4L    | 6   | 27840926  | 27841289  | 1     | 152369 | 10.56 | 2.18E-26         | 4.85E-26    | 7.45E-05     |
| 7726     | TRIM26      | 6   | 30152232  | 30181271  | 132   | 152260 | 9.12  | 3.77E-20         | 4.21E-20    | 1.60E-01     |
| 7916     | PRRC2A      | 6   | 31588450  | 31605554  | 71    | 152194 | 8.82  | 5.98E-19         | 1.16E-18    | 1.04E-01     |
| 775      | CACNA1C     | 12  | 2079952   | 2807115   | 1988  | 152213 | 8.48  | 1.16E-17         | 2.31E-18    | 5.14E-01     |
| 80317    | ZKSCAN3     | 6   | 28317691  | 28336954  | 71    | 152273 | 8.76  | 9.34E-19         | 2.94E-18    | 6.34E-02     |
| 8341     | HIST1H2BN   | 6   | 27805544  | 27821533  | 29    | 152323 | 9.06  | 6.49E-20         | 7.32E-18    | 2.48E-04     |
| 1806     | DPYD        | 1   | 97543299  | 98386615  | 2138  | 152277 | 8.64  | 2.82E-18         | 1.05E-17    | 5.29E-02     |
| 4439     | MSH5        | 6   | 31707725  | 31730455  | 60    | 152288 | 8.51  | 9.00E-18         | 1.42E-17    | 1.29E-01     |
| 6925     | TCF4        | 18  | 52889562  | 53303252  | 701   | 152270 | 7.97  | 8.26E-16         | 1.75E-17    | 9.22E-01     |
| 64288    | ZNF323      | 6   | 28292514  | 28321972  | 102   | 152237 | 8.50  | 9.09E-18         | 2.80E-17    | 6.60E-02     |
| 11074    | TRIM31      | 6   | 30070674  | 30080867  | 81    | 152323 | 8.40  | 2.21E-17         | 3.86E-17    | 1.19E-01     |
| 11120    | BTN2A1      | 6   | 26458132  | 26476849  | 77    | 152286 | 8.83  | 5.05E-19         | 5.50E-17    | 2.23E-04     |
| 81697    | OR2B2       | 6   | 27878963  | 27880174  | 4     | 152366 | 8.64  | 2.73E-18         | 2.00E-16    | 4.69E-04     |
| 11118    | BTN3A2      | 6   | 26365387  | 26378548  | 100   | 152363 | 8.74  | 1.17E-18         | 2.48E-16    | 4.72E-05     |
| 8359     | HIST1H4A    | 6   | 26021907  | 26022278  | 1     | 152378 | 8.27  | 6.87E-17         | 1.28E-15    | 5.28E-03     |
| 9753     | ZSCAN12     | 6   | 28346598  | 28367544  | 71    | 152227 | 8.16  | 1.66E-16         | 1.34E-15    | 1.89E-02     |
| 387032   | ZKSCAN4     | 6   | 28212404  | 28227030  | 36    | 152300 | 8.02  | 5.50E-16         | 1.86E-15    | 6.06E-02     |
| 3009     | HIST1H1B    | 6   | 27834570  | 27835359  | 4     | 152335 | 8.37  | 2.86E-17         | 1.90E-15    | 4.67E-04     |
| 80863    | PRRT1       | 6   | 32116140  | 32119720  | 1     | 152364 | 7.42  | 6.01E-14         | 2.56E-15    | 8.82E-01     |
| 119032   | C10orf32    | 10  | 104613967 | 104624718 | 27    | 152301 | 7.50  | 3.08E-14         | 9.33E-15    | 4.90E-01     |
| 7407     | VARS        | 6   | 31745295  | 31763712  | 38    | 152256 | 7.52  | 2.84E-14         | 1.14E-14    | 4.21E-01     |
| 7741     | ZNF187      | 6   | 28234788  | 28246001  | 18    | 152366 | 7.72  | 5.89E-15         | 1.31E-14    | 9.89E-02     |
| 57412    | AS3MT       | 10  | 104629183 | 104661656 | 121   | 152289 | 7.45  | 4.73E-14         | 1.63E-14    | 4.62E-01     |
| 80737    | VWA7        | 6   | 31733178  | 31745108  | 33    | 152194 | 7.49  | 3.48E-14         | 2.44E-14    | 2.96E-01     |
| 84547    | PGBD1       | 6   | 28249314  | 28270326  | 56    | 152363 | 7.66  | 9.39E-15         | 2.61E-14    | 7.72E-02     |
| 7746     | ZNF193      | 6   | 28193029  | 28201265  | 27    | 152216 | 7.62  | 1.23E-14         | 2.86E-14    | 9.54E-02     |
| 57819    | LSM2        | 6   | 31765169  | 31774761  | 32    | 152293 | 7.46  | 4.37E-14         | 3.03E-14    | 2.96E-01     |
| 63940    | GPSM3       | 6   | 32158543  | 32163300  | 10    | 152357 | 7.44  | 5.04E-14         | 3.80E-14    | 2.77E-01     |
| 5089     | PBX2        | 6   | 32152510  | 32157963  | 15    | 152177 | 7.26  | 1.88E-13         | 4.11E-14    | 5.97E-01     |

|        |           |    |           |           |      |        |      |          |          |          |
|--------|-----------|----|-----------|-----------|------|--------|------|----------|----------|----------|
| 7917   | BAG6      | 6  | 31606805  | 31620953  | 51   | 152124 | 7.59 | 1.65E-14 | 4.32E-14 | 8.32E-02 |
| 27086  | FOXP1     | 3  | 71003865  | 71633140  | 1322 | 152153 | 7.54 | 2.38E-14 | 1.02E-13 | 4.44E-02 |
| 10475  | TRIM38    | 6  | 25962917  | 25987557  | 43   | 152256 | 7.63 | 1.18E-14 | 1.23E-13 | 1.16E-02 |
| 8356   | HIST1H3J  | 6  | 27858093  | 27858570  | 1    | 152376 | 7.65 | 1.04E-14 | 1.43E-13 | 7.32E-03 |
| 10554  | AGPAT1    | 6  | 32135983  | 32145888  | 22   | 152357 | 7.09 | 6.94E-13 | 1.59E-13 | 5.92E-01 |
| 389376 | SFTA2     | 6  | 30899127  | 30899952  | 9    | 152376 | 7.22 | 2.69E-13 | 1.92E-13 | 2.99E-01 |
| 80864  | EGFL8     | 6  | 32132382  | 32136062  | 14   | 152358 | 7.11 | 5.95E-13 | 2.05E-13 | 4.86E-01 |
| 3305   | HSPA1L    | 6  | 31777396  | 31790093  | 34   | 152352 | 7.24 | 2.28E-13 | 2.57E-13 | 2.05E-01 |
| 4855   | NOTCH4    | 6  | 32162620  | 32191844  | 151  | 152305 | 7.25 | 2.09E-13 | 2.65E-13 | 1.84E-01 |
| 7745   | ZNF192    | 6  | 28109688  | 28127250  | 51   | 152284 | 7.49 | 3.50E-14 | 3.00E-13 | 1.56E-02 |
| 6048   | RNF5      | 6  | 32146162  | 32148570  | 11   | 152223 | 6.89 | 2.85E-12 | 3.05E-13 | 7.89E-01 |
| 22978  | NT5C2     | 10 | 104847774 | 104953063 | 254  | 152295 | 7.04 | 9.37E-13 | 3.60E-13 | 4.65E-01 |
| 10786  | SLC17A3   | 6  | 25845328  | 25874471  | 89   | 152313 | 7.66 | 9.62E-15 | 4.06E-13 | 7.48E-04 |
| 8343   | HIST1H2BF | 6  | 26199787  | 26200216  | 5    | 152247 | 7.53 | 2.54E-14 | 5.58E-13 | 2.78E-03 |
| 8354   | HIST1H3I  | 6  | 27839623  | 27840099  | 1    | 152372 | 7.44 | 4.93E-14 | 6.01E-13 | 8.54E-03 |
| 8911   | CACNA1I   | 22 | 39966758  | 40085740  | 273  | 152186 | 6.91 | 2.41E-12 | 6.53E-13 | 5.74E-01 |
| 8340   | HIST1H2BL | 6  | 27775257  | 27775709  | 2    | 152377 | 7.58 | 1.71E-14 | 6.74E-13 | 8.55E-04 |
| 1460   | CSNK2B    | 6  | 31632995  | 31637844  | 19   | 152195 | 7.14 | 4.81E-13 | 7.18E-13 | 1.60E-01 |
| 3017   | HIST1H2BD | 6  | 26157419  | 26171577  | 22   | 152139 | 7.83 | 2.50E-15 | 7.24E-13 | 4.49E-06 |
| 80345  | ZSCAN16   | 6  | 28092334  | 28097864  | 13   | 152350 | 7.37 | 8.72E-14 | 7.55E-13 | 1.51E-02 |
| 5987   | TRIM27    | 6  | 28870779  | 28891768  | 62   | 152180 | 7.12 | 5.26E-13 | 7.60E-13 | 1.65E-01 |
| 10919  | EHMT2     | 6  | 31847536  | 31865464  | 54   | 152280 | 6.92 | 2.28E-12 | 1.05E-12 | 4.28E-01 |
| 783    | CACNB2    | 10 | 18429373  | 18830688  | 1633 | 152247 | 6.61 | 1.91E-11 | 1.21E-12 | 8.93E-01 |
| 135656 | DPCR1     | 6  | 30908777  | 30921998  | 39   | 152283 | 7.17 | 3.85E-13 | 1.41E-12 | 5.42E-02 |
| 8348   | HIST1H2BO | 6  | 27861203  | 27926100  | 117  | 152318 | 7.11 | 5.61E-13 | 1.82E-12 | 6.41E-02 |
| 177    | AGER      | 6  | 32148745  | 32152099  | 13   | 152089 | 6.69 | 1.11E-11 | 1.84E-12 | 7.21E-01 |
| 8332   | HIST1H2AL | 6  | 27833107  | 27833576  | 2    | 152376 | 7.34 | 1.10E-13 | 2.05E-12 | 3.64E-03 |
| 54805  | CNNM2     | 10 | 104678075 | 104838344 | 412  | 152311 | 6.77 | 6.39E-12 | 2.48E-12 | 4.82E-01 |
| 3122   | HLA-DRA   | 6  | 32407619  | 32412823  | 62   | 152335 | 6.94 | 1.90E-12 | 2.99E-12 | 1.53E-01 |
| 3117   | HLA-DQA1  | 6  | 32605169  | 32612152  | 6    | 151269 | 6.85 | 3.63E-12 | 3.19E-12 | 2.92E-01 |
| 79038  | ZFYVE21   | 14 | 104182081 | 104200005 | 41   | 152065 | 7.13 | 5.19E-13 | 3.63E-12 | 1.98E-02 |
| 80736  | SLC44A4   | 6  | 31830969  | 31846823  | 69   | 152187 | 6.68 | 1.18E-11 | 4.39E-12 | 5.06E-01 |
| 26051  | PPP1R16B  | 20 | 37434348  | 37551667  | 286  | 152218 | 7.02 | 1.13E-12 | 4.77E-12 | 4.39E-02 |

|        |           |    |           |           |      |        |      |          |          |          |
|--------|-----------|----|-----------|-----------|------|--------|------|----------|----------|----------|
| 114821 | SCAND3    | 6  | 28539407  | 28555112  | 27   | 152068 | 6.59 | 2.19E-11 | 5.05E-12 | 6.51E-01 |
| 23564  | DDAH2     | 6  | 31694817  | 31698039  | 7    | 152361 | 6.90 | 2.56E-12 | 5.97E-12 | 9.81E-02 |
| 129450 | TYW5      | 2  | 200793634 | 200820459 | 52   | 152300 | 6.55 | 2.90E-11 | 7.67E-12 | 6.06E-01 |
| 8352   | HIST1H3C  | 6  | 26045639  | 26046097  | 3    | 152374 | 7.03 | 1.02E-12 | 8.34E-12 | 1.54E-02 |
| 222696 | ZSCAN23   | 6  | 28399373  | 28411279  | 34   | 152344 | 6.74 | 8.18E-12 | 8.55E-12 | 2.34E-01 |
| 84334  | APOPT1    | 14 | 104029299 | 104057236 | 60   | 152178 | 6.85 | 3.58E-12 | 9.21E-12 | 8.68E-02 |
| 346171 | ZFP57     | 6  | 29640169  | 29644931  | 31   | 152275 | 6.72 | 8.87E-12 | 1.00E-11 | 2.19E-01 |
| 7148   | TNXB      | 6  | 32008932  | 32077151  | 188  | 152176 | 6.61 | 1.96E-11 | 1.08E-11 | 4.04E-01 |
| 3303   | HSPA1A    | 6  | 31782952  | 31785719  | 5    | 152342 | 6.80 | 5.21E-12 | 1.08E-11 | 1.14E-01 |
| 9374   | PPT2      | 6  | 32121229  | 32131458  | 30   | 152304 | 6.64 | 1.58E-11 | 1.16E-11 | 3.20E-01 |
| 55937  | APOM      | 6  | 31620187  | 31625987  | 14   | 152239 | 6.69 | 1.11E-11 | 2.06E-11 | 1.30E-01 |
| 8525   | DGKZ      | 11 | 46354455  | 46402104  | 54   | 151972 | 6.86 | 3.46E-12 | 2.19E-11 | 2.20E-02 |
| 1586   | CYP17A1   | 10 | 104590288 | 104597290 | 20   | 152355 | 6.37 | 9.49E-11 | 2.53E-11 | 6.18E-01 |
| 4482   | MSRA      | 8  | 9911830   | 10286401  | 1584 | 152230 | 6.62 | 1.79E-11 | 2.75E-11 | 1.62E-01 |
| 3106   | HLA-B     | 6  | 31321649  | 31324989  | 180  | 152099 | 6.79 | 5.49E-12 | 2.99E-11 | 2.85E-02 |
| 3077   | HFE       | 6  | 26087422  | 26096438  | 23   | 152293 | 6.69 | 1.15E-11 | 3.05E-11 | 8.39E-02 |
| 554223 | LOC554223 | 6  | 29759683  | 29765584  | 130  | 152362 | 6.35 | 1.07E-10 | 3.28E-11 | 5.82E-01 |
| 57605  | PITPNM2   | 12 | 123468027 | 123635376 | 147  | 152128 | 6.29 | 1.62E-10 | 3.46E-11 | 6.96E-01 |
| 79692  | ZNF322    | 6  | 26634611  | 26659980  | 79   | 152224 | 7.03 | 1.00E-12 | 3.62E-11 | 6.17E-04 |
| 81797  | OR12D3    | 6  | 29341200  | 29343068  | 11   | 152367 | 6.52 | 3.51E-11 | 3.72E-11 | 2.37E-01 |
| 152330 | CNTN4     | 3  | 2140550   | 3099645   | 4412 | 152191 | 6.46 | 5.24E-11 | 5.00E-11 | 2.66E-01 |
| 26010  | SPATS2L   | 2  | 201170604 | 201346986 | 414  | 152257 | 6.64 | 1.53E-11 | 5.11E-11 | 6.07E-02 |
| 55626  | AMBRA1    | 11 | 46417962  | 46615619  | 159  | 151996 | 6.66 | 1.35E-11 | 5.60E-11 | 4.29E-02 |
| 7718   | ZNF165    | 6  | 28048482  | 28057341  | 25   | 152361 | 6.70 | 1.04E-11 | 6.15E-11 | 2.52E-02 |
| 57688  | ZSWIM6    | 5  | 60628100  | 60841999  | 328  | 152241 | 6.51 | 3.69E-11 | 6.35E-11 | 1.44E-01 |
| 203062 | TSNARE1   | 8  | 143293441 | 143484543 | 704  | 152163 | 6.61 | 1.89E-11 | 6.80E-11 | 5.39E-02 |
| 50854  | C6orf48   | 6  | 31802693  | 31807541  | 20   | 152294 | 6.42 | 6.92E-11 | 7.91E-11 | 2.24E-01 |
| 10665  | C6orf10   | 6  | 32260475  | 32339705  | 680  | 152313 | 6.40 | 7.65E-11 | 8.06E-11 | 2.43E-01 |
| 534    | ATP6V1G2  | 6  | 31512228  | 31514625  | 11   | 152072 | 6.33 | 1.23E-10 | 9.47E-11 | 3.28E-01 |
| 6568   | SLC17A1   | 6  | 25783125  | 25832287  | 144  | 152298 | 6.99 | 1.42E-12 | 1.01E-10 | 9.57E-05 |
| 205327 | C2orf69   | 2  | 200775979 | 200792996 | 47   | 152259 | 6.23 | 2.32E-10 | 1.03E-10 | 4.88E-01 |
| 8831   | SYNGAP1   | 6  | 33387847  | 33421466  | 55   | 152023 | 5.97 | 1.16E-09 | 1.48E-10 | 8.44E-01 |
| 64919  | BCL11B    | 14 | 99635624  | 99738514  | 264  | 152120 | 6.22 | 2.43E-10 | 1.67E-10 | 3.64E-01 |

|           |            |    |           |           |       |        |      |          |          |          |
|-----------|------------|----|-----------|-----------|-------|--------|------|----------|----------|----------|
| 10806     | SDCCAG8    | 1  | 243419307 | 243663393 | 416   | 152258 | 6.56 | 2.64E-11 | 1.70E-10 | 2.05E-02 |
| 780       | DDR1       | 6  | 30850694  | 30867933  | 58    | 152329 | 6.29 | 1.57E-10 | 1.74E-10 | 2.34E-01 |
| 91574     | C12orf65   | 12 | 123717844 | 123742651 | 76    | 152168 | 5.85 | 2.49E-09 | 1.83E-10 | 9.26E-01 |
| 23368     | PPP1R13B   | 14 | 104200088 | 104315116 | 256   | 152250 | 6.44 | 5.80E-11 | 2.17E-10 | 5.02E-02 |
| 25843     | MOB4       | 2  | 198380295 | 198418423 | 42    | 152146 | 6.08 | 5.90E-10 | 2.36E-10 | 5.36E-01 |
| 9529      | BAG5       | 14 | 104022881 | 104029151 | 11    | 152318 | 6.29 | 1.55E-10 | 3.06E-10 | 1.23E-01 |
| 3769      | KCNJ13     | 2  | 233630512 | 233641275 | 28    | 152323 | 6.15 | 3.77E-10 | 3.06E-10 | 3.17E-01 |
| 5740      | PTGIS      | 20 | 48120411  | 48184707  | 111   | 152024 | 5.92 | 1.60E-09 | 3.68E-10 | 7.16E-01 |
| 7517      | XRCC3      | 14 | 104163945 | 104181823 | 31    | 152291 | 6.23 | 2.31E-10 | 3.80E-10 | 1.54E-01 |
| 25791     | NGEF       | 2  | 233743396 | 233877951 | 573   | 152206 | 6.44 | 5.89E-11 | 4.08E-10 | 1.73E-02 |
| 100529241 | HSPE1-MOB4 | 2  | 198364721 | 198418423 | 59    | 152160 | 6.00 | 9.70E-10 | 4.24E-10 | 5.15E-01 |
| 8087      | FXR1       | 3  | 180630096 | 180700541 | 107   | 152224 | 6.02 | 8.89E-10 | 4.53E-10 | 4.64E-01 |
| 2242      | FES        | 15 | 91427665  | 91439006  | 31    | 152145 | 6.33 | 1.25E-10 | 5.07E-10 | 4.31E-02 |
| 29777     | ABT1       | 6  | 26597171  | 26600278  | 14    | 152363 | 6.47 | 4.82E-11 | 5.26E-10 | 7.21E-03 |
| 56658     | TRIM39     | 6  | 30294227  | 30311506  | 41    | 152360 | 6.18 | 3.21E-10 | 5.36E-10 | 1.52E-01 |
| 8379      | MAD1L1     | 7  | 1855428   | 2272583   | 1745  | 152229 | 6.12 | 4.77E-10 | 6.19E-10 | 2.04E-01 |
| 9881      | TRANK1     | 3  | 36868308  | 36986548  | 258   | 152202 | 6.00 | 9.59E-10 | 7.07E-10 | 3.55E-01 |
| 64478     | CSMD1      | 8  | 2792875   | 4852328   | 16719 | 152225 | 6.17 | 3.36E-10 | 7.12E-10 | 1.13E-01 |
| 23451     | SF3B1      | 2  | 198256698 | 198299815 | 41    | 152242 | 5.95 | 1.37E-09 | 7.83E-10 | 4.33E-01 |
| 9776      | ATG13      | 11 | 46638826  | 46697569  | 50    | 151955 | 6.21 | 2.70E-10 | 9.00E-10 | 5.79E-02 |
| 3699      | ITIH3      | 3  | 52828784  | 52843025  | 21    | 152198 | 5.93 | 1.52E-09 | 1.06E-09 | 3.76E-01 |
| 22891     | ZNF365     | 10 | 64133916  | 64431771  | 912   | 152230 | 5.80 | 3.39E-09 | 1.15E-09 | 6.07E-01 |
| 10198     | MPHOSPH9   | 12 | 123640943 | 123717785 | 198   | 152198 | 5.65 | 8.02E-09 | 1.16E-09 | 8.40E-01 |
| 7444      | VRK2       | 2  | 58273777  | 58387055  | 165   | 152258 | 5.65 | 7.95E-09 | 1.21E-09 | 8.26E-01 |
| 6314      | ATXN7      | 3  | 63849785  | 63989240  | 225   | 152198 | 5.79 | 3.45E-09 | 1.27E-09 | 5.84E-01 |
| 259215    | LY6G6F     | 6  | 31674625  | 31678372  | 15    | 152212 | 6.11 | 5.08E-10 | 1.34E-09 | 8.36E-02 |
| 9892      | SNAP91     | 6  | 84262604  | 84419127  | 297   | 152235 | 5.77 | 4.02E-09 | 1.40E-09 | 6.02E-01 |
| 23293     | SMG6       | 17 | 1963133   | 2207069   | 657   | 152265 | 5.92 | 1.64E-09 | 1.45E-09 | 3.04E-01 |
| 51460     | SFMBT1     | 3  | 52933221  | 53080089  | 321   | 152232 | 6.02 | 8.56E-10 | 1.53E-09 | 1.41E-01 |
| 8334      | HIST1H2AC  | 6  | 26124370  | 26139337  | 49    | 152327 | 6.10 | 5.15E-10 | 1.59E-09 | 6.60E-02 |
| 1143      | CHRNB4     | 15 | 78916636  | 78933587  | 33    | 152040 | 6.14 | 4.02E-10 | 1.73E-09 | 3.75E-02 |
| 3833      | KIFC1      | 6  | 33359301  | 33377701  | 47    | 152179 | 5.73 | 5.17E-09 | 1.76E-09 | 6.16E-01 |
| 3700      | ITIH4      | 3  | 52847006  | 52864717  | 39    | 152227 | 5.86 | 2.35E-09 | 1.93E-09 | 3.30E-01 |

|           |              |    |           |           |      |        |      |          |          |          |
|-----------|--------------|----|-----------|-----------|------|--------|------|----------|----------|----------|
| 1136      | CHRNA3       | 15 | 78885394  | 78913637  | 92   | 152263 | 6.14 | 4.04E-10 | 1.98E-09 | 3.06E-02 |
| 9344      | TAOK2        | 16 | 29985188  | 30003583  | 24   | 152076 | 6.01 | 9.08E-10 | 2.30E-09 | 8.79E-02 |
| 124446    | TMEM219      | 16 | 29973351  | 29984373  | 21   | 152071 | 5.92 | 1.59E-09 | 2.32E-09 | 1.83E-01 |
| 4900      | NRGN         | 11 | 124609829 | 124617102 | 12   | 152300 | 5.94 | 1.39E-09 | 2.33E-09 | 1.53E-01 |
| 79568     | C2orf47      | 2  | 200820040 | 200828848 | 16   | 152247 | 5.71 | 5.65E-09 | 2.34E-09 | 5.53E-01 |
| 80740     | LY6G6C       | 6  | 31686425  | 31689511  | 8    | 152364 | 6.01 | 9.08E-10 | 2.34E-09 | 8.61E-02 |
| 22997     | IGSF9B       | 11 | 133778520 | 133826649 | 136  | 152231 | 5.85 | 2.42E-09 | 2.67E-09 | 2.50E-01 |
| 3107      | HLA-C        | 6  | 31236526  | 31239913  | 179  | 152273 | 5.83 | 2.69E-09 | 2.87E-09 | 2.58E-01 |
| 3710      | ITPR3        | 6  | 33587951  | 33664351  | 340  | 152278 | 5.95 | 1.36E-09 | 3.00E-09 | 1.07E-01 |
| 5334      | PLCL1        | 2  | 198669426 | 199014608 | 593  | 152251 | 5.70 | 6.02E-09 | 3.01E-09 | 4.93E-01 |
| 629       | CFB          | 6  | 31913721  | 31919861  | 20   | 152212 | 5.76 | 4.10E-09 | 3.12E-09 | 3.57E-01 |
| 253980    | KCTD13       | 16 | 29917657  | 29937545  | 36   | 152104 | 5.75 | 4.41E-09 | 3.24E-09 | 3.72E-01 |
| 56899     | ANKS1B       | 12 | 99128569  | 100378512 | 3175 | 152186 | 5.50 | 1.86E-08 | 3.46E-09 | 8.01E-01 |
| 84942     | WDR73        | 15 | 85185607  | 85197521  | 32   | 152268 | 5.74 | 4.61E-09 | 3.54E-09 | 3.54E-01 |
| 4828      | NMB          | 15 | 85198360  | 85201802  | 12   | 152275 | 5.83 | 2.82E-09 | 3.66E-09 | 2.10E-01 |
| 7918      | GPANK1       | 6  | 31629006  | 31634060  | 29   | 152195 | 5.97 | 1.16E-09 | 3.73E-09 | 6.09E-02 |
| 55568     | GALNT10      | 5  | 153570295 | 153800544 | 841  | 152260 | 6.01 | 9.01E-10 | 4.05E-09 | 3.47E-02 |
| 2107      | ETF1         | 5  | 137841782 | 137878989 | 66   | 152150 | 5.64 | 8.54E-09 | 4.33E-09 | 4.97E-01 |
| 26058     | GIGYF2       | 2  | 233562015 | 233725287 | 404  | 152174 | 5.75 | 4.41E-09 | 4.91E-09 | 2.50E-01 |
| 9640      | ZNF592       | 15 | 85291818  | 85349663  | 134  | 152199 | 5.87 | 2.13E-09 | 4.93E-09 | 1.00E-01 |
| 8347      | HIST1H2BC    | 6  | 26113389  | 26124266  | 39   | 152273 | 6.03 | 8.24E-10 | 5.04E-09 | 1.95E-02 |
| 22990     | PCNX         | 14 | 71374122  | 71582099  | 537  | 152169 | 5.49 | 1.97E-08 | 5.16E-09 | 7.15E-01 |
| 10384     | BTN3A3       | 6  | 26440700  | 26453643  | 36   | 152318 | 6.00 | 1.01E-09 | 5.26E-09 | 2.64E-02 |
| 3024      | HIST1H1A     | 6  | 26017260  | 26018040  | 4    | 152345 | 5.79 | 3.42E-09 | 5.42E-09 | 1.66E-01 |
| 10050     | SLC17A4      | 6  | 25754927  | 25781403  | 106  | 152332 | 6.09 | 5.63E-10 | 5.56E-09 | 7.32E-03 |
| 203068    | TUBB         | 6  | 30688012  | 30693199  | 24   | 152215 | 5.83 | 2.70E-09 | 5.60E-09 | 1.17E-01 |
| 51177     | PLEKHO1      | 1  | 150122170 | 150131825 | 13   | 152116 | 5.51 | 1.80E-08 | 5.99E-09 | 6.46E-01 |
| 80145     | THOC7        | 3  | 63819546  | 63849597  | 37   | 152252 | 5.53 | 1.65E-08 | 6.14E-09 | 6.02E-01 |
| 80739     | C6orf25      | 6  | 31691121  | 31694487  | 4    | 152369 | 6.03 | 8.44E-10 | 6.21E-09 | 1.35E-02 |
| 221545    | C6orf136     | 6  | 30614816  | 30620987  | 13   | 152245 | 5.73 | 4.98E-09 | 6.79E-09 | 2.00E-01 |
| 100526772 | MEM110-MUSTI | 3  | 52867131  | 52931597  | 128  | 152291 | 5.75 | 4.34E-09 | 7.41E-09 | 1.51E-01 |
| 51201     | ZDHHC2       | 8  | 17013836  | 17080241  | 212  | 152159 | 5.70 | 6.04E-09 | 7.90E-09 | 2.11E-01 |
| 9980      | DOPEY2       | 21 | 37529080  | 37666572  | 578  | 152252 | 5.29 | 6.05E-08 | 8.45E-09 | 8.74E-01 |

|        |              |    |           |           |       |        |      |          |          |          |
|--------|--------------|----|-----------|-----------|-------|--------|------|----------|----------|----------|
| 130132 | RFTN2        | 2  | 198435524 | 198540774 | 162   | 152214 | 5.48 | 2.11E-08 | 8.71E-09 | 5.75E-01 |
| 5045   | FURIN        | 15 | 91411885  | 91426687  | 27    | 152185 | 5.84 | 2.54E-09 | 8.82E-09 | 5.27E-02 |
| 375346 | TMEM110      | 3  | 52870772  | 52931597  | 117   | 152295 | 5.72 | 5.43E-09 | 1.02E-08 | 1.34E-01 |
| 51329  | ARL6IP4      | 12 | 123464607 | 123467460 | 1     | 152149 | 5.49 | 2.07E-08 | 1.04E-08 | 5.13E-01 |
| 4668   | NAGA         | 22 | 42454338  | 42466852  | 24    | 152110 | 5.16 | 1.25E-07 | 1.12E-08 | 9.45E-01 |
| 54815  | GATAD2A      | 19 | 19496642  | 19619741  | 174   | 152235 | 5.51 | 1.76E-08 | 1.16E-08 | 4.17E-01 |
| 54715  | RBFOX1       | 16 | 5289469   | 7763342   | 13709 | 152146 | 5.72 | 5.18E-09 | 1.26E-08 | 9.24E-02 |
| 5096   | PCCB         | 3  | 135969167 | 136056737 | 135   | 152206 | 5.27 | 6.87E-08 | 1.35E-08 | 8.10E-01 |
| 23362  | PSD3         | 8  | 18384813  | 18871196  | 2478  | 152221 | 5.70 | 5.99E-09 | 1.38E-08 | 1.01E-01 |
| 54535  | CCHCR1       | 6  | 31110216  | 31126015  | 170   | 152360 | 5.40 | 3.39E-08 | 1.43E-08 | 5.69E-01 |
| 54993  | ZSCAN2       | 15 | 85144249  | 85166947  | 40    | 152186 | 5.50 | 1.91E-08 | 1.50E-08 | 3.61E-01 |
| 91647  | ATPAF2       | 17 | 17921334  | 17942483  | 23    | 152321 | 5.52 | 1.71E-08 | 1.53E-08 | 3.18E-01 |
| 222698 | NKAPL        | 6  | 28227075  | 28228736  | 6     | 152371 | 5.38 | 3.73E-08 | 1.69E-08 | 5.46E-01 |
| 199    | AIF1         | 6  | 31582969  | 31584798  | 9     | 152357 | 5.54 | 1.55E-08 | 1.82E-08 | 2.41E-01 |
| 1192   | CLIC1        | 6  | 31698358  | 31705095  | 9     | 152002 | 5.58 | 1.18E-08 | 1.89E-08 | 1.66E-01 |
| 83983  | TSSK6        | 19 | 19625028  | 19626469  | 1     | 152372 | 5.37 | 3.93E-08 | 1.98E-08 | 5.13E-01 |
| 51291  | GMIP         | 19 | 19740285  | 19754457  | 22    | 152101 | 5.24 | 8.21E-08 | 2.08E-08 | 7.53E-01 |
| 83450  | LRRC48       | 17 | 17876127  | 17920203  | 70    | 152268 | 5.41 | 3.23E-08 | 2.21E-08 | 4.09E-01 |
| 1589   | CYP21A2      | 6  | 32006093  | 32009447  | 26    | 152162 | 5.39 | 3.43E-08 | 2.34E-08 | 4.15E-01 |
| 202658 | TRIM39-RPP21 | 6  | 30297088  | 30314635  | 54    | 152337 | 5.55 | 1.41E-08 | 2.36E-08 | 1.57E-01 |
| 79676  | OGFOD2       | 12 | 123459354 | 123464588 | 6     | 152174 | 5.31 | 5.59E-08 | 2.49E-08 | 5.67E-01 |
| 23166  | STAB1        | 3  | 52529354  | 52558512  | 45    | 152248 | 5.21 | 9.69E-08 | 2.53E-08 | 7.41E-01 |
| 283254 | HARBI1       | 11 | 46624856  | 46638933  | 10    | 151946 | 5.68 | 6.83E-09 | 2.58E-08 | 4.30E-02 |
| 8120   | AP3B2        | 15 | 83328033  | 83378660  | 121   | 152333 | 5.28 | 6.42E-08 | 2.80E-08 | 5.70E-01 |
| 667    | DST          | 6  | 56322785  | 56819426  | 957   | 152255 | 5.98 | 1.09E-09 | 2.89E-08 | 4.63E-04 |
| 4842   | NOS1         | 12 | 117645921 | 117799607 | 446   | 152194 | 5.42 | 3.03E-08 | 3.05E-08 | 2.88E-01 |
| 3119   | HLA-DQB1     | 6  | 32627241  | 32634466  | 31    | 151262 | 5.24 | 8.00E-08 | 3.06E-08 | 6.65E-01 |
| 55830  | GLT8D1       | 3  | 52728500  | 52740099  | 16    | 152229 | 5.23 | 8.35E-08 | 3.08E-08 | 6.35E-01 |
| 3313   | HSPA9        | 5  | 137890571 | 137911318 | 40    | 152062 | 5.33 | 5.03E-08 | 3.15E-08 | 4.51E-01 |
| 79969  | ATAT1        | 6  | 30594613  | 30614598  | 52    | 152212 | 5.55 | 1.45E-08 | 3.19E-08 | 1.07E-01 |
| 64506  | CPEB1        | 15 | 83211948  | 83316762  | 276   | 152292 | 5.24 | 8.05E-08 | 3.23E-08 | 6.03E-01 |
| 90952  | ESAM         | 11 | 124623019 | 124632223 | 12    | 151942 | 5.22 | 9.07E-08 | 3.41E-08 | 6.42E-01 |
| 392    | ARHGAP1      | 11 | 46698625  | 46722215  | 27    | 151985 | 5.41 | 3.11E-08 | 3.51E-08 | 2.58E-01 |

|           |              |    |           |           |      |        |      |          |          |          |
|-----------|--------------|----|-----------|-----------|------|--------|------|----------|----------|----------|
| 1138      | CHRNA5       | 15 | 78857862  | 78887611  | 66   | 152256 | 5.60 | 1.07E-08 | 3.55E-08 | 5.57E-02 |
| 8099      | CDK2AP1      | 12 | 123745517 | 123756863 | 31   | 152228 | 5.08 | 1.91E-07 | 3.80E-08 | 8.22E-01 |
| 717       | C2           | 6  | 31865562  | 31913449  | 145  | 152252 | 5.51 | 1.84E-08 | 4.04E-08 | 1.07E-01 |
| 4277      | MICB         | 6  | 31462054  | 31478901  | 229  | 152321 | 5.49 | 2.03E-08 | 4.24E-08 | 1.15E-01 |
| 10000     | AKT3         | 1  | 243651535 | 244014381 | 475  | 152213 | 5.52 | 1.71E-08 | 4.56E-08 | 7.87E-02 |
| 389125    | MUSTN1       | 3  | 52867131  | 52869235  | 7    | 152201 | 5.17 | 1.18E-07 | 4.58E-08 | 6.24E-01 |
| 11311     | VPS45        | 1  | 150039350 | 150117505 | 90   | 152315 | 5.16 | 1.23E-07 | 5.06E-08 | 6.01E-01 |
| 6733      | SRPK2        | 7  | 104754048 | 105039614 | 519  | 152232 | 5.77 | 4.02E-09 | 5.32E-08 | 2.73E-03 |
| 83943     | IMMP2L       | 7  | 110303106 | 111202588 | 1722 | 152222 | 5.36 | 4.21E-08 | 5.35E-08 | 2.24E-01 |
| 3658      | IREB2        | 15 | 78730518  | 78793798  | 135  | 152239 | 5.19 | 1.07E-07 | 5.35E-08 | 5.36E-01 |
| 4916      | NTRK3        | 15 | 88419948  | 88800026  | 819  | 152243 | 5.17 | 1.17E-07 | 5.45E-08 | 5.59E-01 |
| 63826     | SRR          | 17 | 2207244   | 2228553   | 35   | 152057 | 5.02 | 2.53E-07 | 5.58E-08 | 8.11E-01 |
| 100505679 | LOC100505679 | 15 | 84841138  | 84854921  | 5    | 151777 | 5.14 | 1.34E-07 | 5.75E-08 | 6.11E-01 |
| 83698     | CALN1        | 7  | 71244476  | 71912136  | 1915 | 152211 | 4.90 | 4.85E-07 | 6.01E-08 | 9.22E-01 |
| 1813      | DRD2         | 11 | 113280317 | 113346413 | 176  | 152291 | 5.29 | 6.17E-08 | 6.31E-08 | 2.87E-01 |
| 23659     | PLA2G15      | 16 | 68279240  | 68294965  | 27   | 152342 | 5.29 | 6.15E-08 | 6.47E-08 | 2.77E-01 |
| 79019     | CENPM        | 22 | 42334531  | 42343155  | 30   | 152342 | 5.05 | 2.24E-07 | 6.59E-08 | 7.19E-01 |
| 79018     | GID4         | 17 | 17942611  | 17971719  | 46   | 152265 | 5.31 | 5.39E-08 | 6.77E-08 | 2.28E-01 |
| 388336    | SHISA6       | 17 | 11144740  | 11467380  | 1106 | 152208 | 4.97 | 3.32E-07 | 7.35E-08 | 8.09E-01 |
| 55964     | SEPT3        | 22 | 42372855  | 42394225  | 51   | 152218 | 5.00 | 2.93E-07 | 7.65E-08 | 7.63E-01 |
| 94026     | POM121L2     | 6  | 27276842  | 27280011  | 12   | 152138 | 5.60 | 1.07E-08 | 8.58E-08 | 8.45E-03 |
| 10246     | SLC17A2      | 6  | 25912982  | 25930954  | 60   | 152274 | 5.68 | 6.67E-09 | 8.95E-08 | 2.48E-03 |
| 5526      | PPP2R5B      | 11 | 64692143  | 64701950  | 22   | 152254 | 5.03 | 2.50E-07 | 1.06E-07 | 6.06E-01 |
| 164684    | WBP2NL       | 22 | 42391607  | 42428935  | 84   | 152286 | 4.99 | 3.09E-07 | 1.09E-07 | 6.72E-01 |
| 26354     | GNL3         | 3  | 52719936  | 52728513  | 13   | 152343 | 4.97 | 3.36E-07 | 1.18E-07 | 6.72E-01 |
| 4700      | NDUFA6       | 22 | 42481530  | 42486888  | 11   | 152214 | 4.82 | 7.15E-07 | 1.23E-07 | 8.76E-01 |
| 8448      | DOC2A        | 16 | 30016835  | 30023424  | 12   | 152340 | 5.34 | 4.69E-08 | 1.29E-07 | 7.39E-02 |
| 23383     | MAU2         | 19 | 19431496  | 19469563  | 72   | 152200 | 5.02 | 2.65E-07 | 1.35E-07 | 5.44E-01 |
| 1819      | DRG2         | 17 | 17991181  | 18011299  | 35   | 152279 | 5.27 | 6.81E-08 | 1.36E-07 | 1.23E-01 |
| 79913     | ACTR5        | 20 | 37376933  | 37401089  | 106  | 152243 | 5.25 | 7.49E-08 | 1.40E-07 | 1.35E-01 |
| 3831      | KLC1         | 14 | 104095525 | 104167888 | 158  | 152290 | 5.16 | 1.25E-07 | 1.42E-07 | 2.58E-01 |
| 117283    | IP6K3        | 6  | 33689415  | 33714762  | 111  | 152296 | 5.17 | 1.17E-07 | 1.46E-07 | 2.32E-01 |
| 696       | BTN1A1       | 6  | 26500577  | 26510653  | 21   | 152355 | 5.50 | 1.93E-08 | 1.47E-07 | 9.72E-03 |



|        |          |    |           |           |      |        |      |          |          |          |
|--------|----------|----|-----------|-----------|------|--------|------|----------|----------|----------|
| 56147  | PCDHA1   | 5  | 140165876 | 140391929 | 461  | 152187 | 5.09 | 1.78E-07 | 1.51E-07 | 3.55E-01 |
| 8859   | STK19    | 6  | 31938952  | 31949223  | 41   | 152127 | 5.31 | 5.41E-08 | 1.63E-07 | 6.23E-02 |
| 55793  | FAM63A   | 1  | 150969213 | 150980854 | 18   | 152228 | 5.38 | 3.71E-08 | 1.65E-07 | 3.01E-02 |
| 283899 | INO80E   | 16 | 30007485  | 30017112  | 24   | 152269 | 5.23 | 8.54E-08 | 1.81E-07 | 1.12E-01 |
| 6252   | RTN1     | 14 | 60062694  | 60337557  | 502  | 152242 | 4.79 | 8.38E-07 | 1.90E-07 | 8.18E-01 |
| 399979 | SNX19    | 11 | 130745766 | 130786382 | 231  | 152272 | 4.72 | 1.15E-06 | 1.93E-07 | 8.87E-01 |
| 55193  | PBRM1    | 3  | 52579368  | 52719866  | 328  | 152263 | 4.86 | 5.83E-07 | 1.98E-07 | 6.97E-01 |
| 51567  | TDP2     | 6  | 24650205  | 24667115  | 66   | 152229 | 5.11 | 1.59E-07 | 2.08E-07 | 2.21E-01 |
| 56146  | PCDHA2   | 5  | 140174444 | 140391929 | 444  | 152181 | 5.04 | 2.36E-07 | 2.10E-07 | 3.44E-01 |
| 133482 | SLCO6A1  | 5  | 101707492 | 101834720 | 476  | 152327 | 4.94 | 3.92E-07 | 2.13E-07 | 5.23E-01 |
| 3990   | LIPC     | 15 | 58702953  | 58861073  | 507  | 152053 | 5.03 | 2.43E-07 | 2.18E-07 | 3.43E-01 |
| 280636 | C11orf31 | 11 | 57508722  | 57510883  | 3    | 152339 | 5.38 | 3.75E-08 | 2.22E-07 | 1.64E-02 |
| 53335  | BCL11A   | 2  | 60678302  | 60780633  | 163  | 152173 | 5.00 | 2.87E-07 | 2.23E-07 | 3.93E-01 |
| 387893 | SETD8    | 12 | 123868704 | 123893900 | 60   | 152217 | 4.91 | 4.58E-07 | 2.24E-07 | 5.68E-01 |
| 4248   | MGAT3    | 22 | 39843235  | 39888199  | 74   | 152113 | 4.96 | 3.61E-07 | 2.25E-07 | 4.78E-01 |
| 221504 | ZBTB9    | 6  | 33422356  | 33425321  | 4    | 152027 | 5.02 | 2.59E-07 | 2.31E-07 | 3.45E-01 |
| 10274  | STAG1    | 3  | 136055077 | 136471245 | 634  | 152259 | 4.83 | 6.95E-07 | 2.35E-07 | 7.02E-01 |
| 5252   | PHF1     | 6  | 33378773  | 33384230  | 11   | 152225 | 4.85 | 6.15E-07 | 2.36E-07 | 6.58E-01 |
| 6787   | NEK4     | 3  | 52744796  | 52804965  | 134  | 152256 | 4.85 | 6.12E-07 | 2.38E-07 | 6.52E-01 |
| 1388   | ATF6B    | 6  | 32083045  | 32096017  | 25   | 152080 | 5.09 | 1.82E-07 | 2.40E-07 | 2.20E-01 |
| 253982 | ASPHD1   | 16 | 29912147  | 29931181  | 25   | 151977 | 5.01 | 2.77E-07 | 2.49E-07 | 3.45E-01 |
| 22986  | SORCS3   | 10 | 106400859 | 107024993 | 1856 | 152293 | 4.96 | 3.51E-07 | 2.53E-07 | 4.19E-01 |
| 25921  | ZDHHC5   | 11 | 57435223  | 57468659  | 51   | 152161 | 5.49 | 2.04E-08 | 2.60E-07 | 2.24E-03 |
| 56145  | PCDHA3   | 5  | 140180783 | 140391929 | 433  | 152184 | 5.00 | 2.86E-07 | 2.62E-07 | 3.35E-01 |
| 6941   | TCF19    | 6  | 31126303  | 31134183  | 56   | 152368 | 4.97 | 3.29E-07 | 2.65E-07 | 3.77E-01 |
| 29113  | C6orf15  | 6  | 31079000  | 31080332  | 17   | 152367 | 4.84 | 6.47E-07 | 2.75E-07 | 6.18E-01 |
| 3697   | ITIH1    | 3  | 52811602  | 52826084  | 36   | 152196 | 4.91 | 4.49E-07 | 2.76E-07 | 4.83E-01 |
| 2260   | FGFR1    | 8  | 38268656  | 38326352  | 84   | 152085 | 4.98 | 3.26E-07 | 3.00E-07 | 3.36E-01 |
| 50651  | SLC45A1  | 1  | 8378171   | 8404227   | 86   | 152175 | 4.71 | 1.21E-06 | 3.02E-07 | 8.05E-01 |
| 3135   | HLA-G    | 6  | 29794756  | 29798899  | 74   | 152350 | 4.67 | 1.49E-06 | 3.05E-07 | 8.49E-01 |
| 57794  | SUGP1    | 19 | 19387320  | 19431321  | 85   | 152312 | 4.89 | 5.04E-07 | 3.10E-07 | 4.81E-01 |
| 79161  | C7orf23  | 7  | 86825477  | 86849889  | 73   | 152273 | 4.92 | 4.43E-07 | 3.12E-07 | 4.31E-01 |
| 9988   | DMTF1    | 7  | 86781677  | 86825648  | 140  | 152312 | 4.87 | 5.50E-07 | 3.32E-07 | 4.89E-01 |

|        |          |    |           |           |      |        |      |          |          |          |
|--------|----------|----|-----------|-----------|------|--------|------|----------|----------|----------|
| 146691 | TOM1L2   | 17 | 17746822  | 17875784  | 169  | 152296 | 4.79 | 8.28E-07 | 3.41E-07 | 6.37E-01 |
| 23478  | SEC11A   | 15 | 85212768  | 85259691  | 102  | 152192 | 5.04 | 2.36E-07 | 3.42E-07 | 1.94E-01 |
| 80219  | COQ10B   | 2  | 198318231 | 198339851 | 21   | 152100 | 4.89 | 4.95E-07 | 3.44E-07 | 4.42E-01 |
| 131118 | DNAJC19  | 3  | 180701497 | 180707562 | 4    | 152111 | 4.93 | 4.21E-07 | 3.48E-07 | 3.76E-01 |
| 346157 | ZNF391   | 6  | 27356524  | 27371683  | 90   | 152346 | 5.05 | 2.16E-07 | 3.53E-07 | 1.65E-01 |
| 10385  | BTN2A2   | 6  | 26383111  | 26395102  | 48   | 152324 | 5.11 | 1.65E-07 | 3.58E-07 | 1.08E-01 |
| 389421 | LIN28B   | 6  | 105384874 | 105531207 | 199  | 152131 | 4.93 | 4.08E-07 | 3.79E-07 | 3.33E-01 |
| 64943  | NT5DC2   | 3  | 52558385  | 52569093  | 26   | 152244 | 4.74 | 1.06E-06 | 3.84E-07 | 6.89E-01 |
| 56144  | PCDHA4   | 5  | 140186672 | 140391929 | 412  | 152181 | 4.92 | 4.30E-07 | 4.17E-07 | 3.18E-01 |
| 170679 | PSORS1C1 | 6  | 31082608  | 31107869  | 321  | 152331 | 4.81 | 7.59E-07 | 4.32E-07 | 5.16E-01 |
| 9889   | ZBED4    | 22 | 50247497  | 50283726  | 132  | 152169 | 4.62 | 1.92E-06 | 4.35E-07 | 8.38E-01 |
| 1803   | DPP4     | 2  | 162848751 | 162931052 | 136  | 152015 | 4.95 | 3.63E-07 | 4.39E-07 | 2.48E-01 |
| 27303  | RBMS3    | 3  | 29322351  | 30051886  | 2974 | 152268 | 4.78 | 8.63E-07 | 4.47E-07 | 5.55E-01 |
| 3304   | HSPA1B   | 6  | 31789964  | 31798032  | 17   | 152039 | 4.95 | 3.73E-07 | 4.53E-07 | 2.46E-01 |
| 24149  | ZNF318   | 6  | 43303808  | 43337181  | 48   | 152236 | 5.11 | 1.62E-07 | 4.67E-07 | 6.54E-02 |
| 196383 | RILPL2   | 12 | 123899936 | 123921264 | 51   | 151658 | 4.73 | 1.14E-06 | 4.75E-07 | 6.66E-01 |
| 6720   | SREBF1   | 17 | 17714663  | 17740331  | 39   | 152210 | 4.71 | 1.25E-06 | 4.97E-07 | 6.62E-01 |
| 137492 | VPS37A   | 8  | 17104401  | 17155533  | 175  | 152292 | 4.97 | 3.38E-07 | 5.09E-07 | 1.85E-01 |
| 64080  | RBKS     | 2  | 28004266  | 28113223  | 179  | 152248 | 4.56 | 2.55E-06 | 5.31E-07 | 8.59E-01 |
| 170680 | PSORS1C2 | 6  | 31105311  | 31107127  | 21   | 152354 | 4.59 | 2.20E-06 | 5.46E-07 | 8.12E-01 |
| 57188  | ADAMTSL3 | 15 | 84322838  | 84708594  | 1051 | 152277 | 4.98 | 3.20E-07 | 5.64E-07 | 1.48E-01 |
| 79684  | MSANTD2  | 11 | 124636388 | 124670868 | 59   | 151888 | 4.81 | 7.50E-07 | 5.70E-07 | 4.18E-01 |
| 473    | RERE     | 1  | 8412464   | 8877699   | 702  | 152234 | 4.86 | 5.83E-07 | 5.82E-07 | 3.10E-01 |
| 3336   | HSPE1    | 2  | 198364721 | 198368187 | 2    | 152372 | 4.72 | 1.20E-06 | 5.96E-07 | 5.72E-01 |
| 5330   | PLCB2    | 15 | 40576461  | 40600174  | 44   | 152055 | 4.88 | 5.43E-07 | 6.24E-07 | 2.66E-01 |
| 7840   | ALMS1    | 2  | 73612886  | 73837047  | 384  | 152208 | 4.60 | 2.11E-06 | 6.32E-07 | 7.64E-01 |
| 26707  | OR2J2    | 6  | 29141311  | 29142351  | 7    | 152372 | 4.79 | 8.50E-07 | 6.62E-07 | 3.99E-01 |
| 374887 | YJEFN3   | 19 | 19639670  | 19648393  | 14   | 152355 | 4.68 | 1.46E-06 | 6.88E-07 | 5.96E-01 |
| 9093   | DNAJA3   | 16 | 4475806   | 4506776   | 60   | 152150 | 4.57 | 2.48E-06 | 6.90E-07 | 7.91E-01 |
| 9861   | PSMD6    | 3  | 63996225  | 64009686  | 37   | 152243 | 4.64 | 1.73E-06 | 7.04E-07 | 6.59E-01 |
| 7068   | THRB     | 3  | 24158644  | 24536772  | 1126 | 152240 | 4.93 | 4.12E-07 | 7.07E-07 | 1.54E-01 |
| 7932   | OR2H2    | 6  | 29553818  | 29556745  | 7    | 152302 | 4.98 | 3.12E-07 | 7.12E-07 | 9.80E-02 |
| 23457  | ABCB9    | 12 | 123405498 | 123451056 | 33   | 152042 | 4.67 | 1.48E-06 | 7.99E-07 | 5.56E-01 |

|           |           |    |           |           |      |        |      |          |          |          |
|-----------|-----------|----|-----------|-----------|------|--------|------|----------|----------|----------|
| 3105      | HLA-A     | 6  | 29910247  | 29913661  | 186  | 152198 | 4.93 | 4.07E-07 | 8.12E-07 | 1.22E-01 |
| 56135     | PCDHAC1   | 5  | 140306302 | 140391929 | 209  | 152199 | 4.91 | 4.65E-07 | 8.15E-07 | 1.49E-01 |
| 6499      | SKIV2L    | 6  | 31926581  | 31937532  | 38   | 152074 | 5.03 | 2.51E-07 | 8.36E-07 | 4.79E-02 |
| 57176     | VAR52     | 6  | 30881982  | 30894236  | 64   | 152360 | 4.60 | 2.08E-06 | 8.94E-07 | 6.38E-01 |
| 53345     | TM6SF2    | 19 | 19374841  | 19384074  | 24   | 152222 | 4.72 | 1.18E-06 | 9.25E-07 | 4.03E-01 |
| 56136     | PCDHA13   | 5  | 140261854 | 140391929 | 287  | 152213 | 4.82 | 7.01E-07 | 9.76E-07 | 2.08E-01 |
| 348980    | HCN1      | 5  | 45255052  | 45696220  | 404  | 152188 | 4.70 | 1.31E-06 | 1.01E-06 | 4.10E-01 |
| 56143     | PCDHA5    | 5  | 140201361 | 140391929 | 384  | 152186 | 4.76 | 9.46E-07 | 1.02E-06 | 2.88E-01 |
| 51075     | TMX2      | 11 | 57479995  | 57508445  | 46   | 152259 | 5.11 | 1.58E-07 | 1.03E-06 | 1.10E-02 |
| 28972     | SPCS1     | 3  | 52739792  | 52742198  | 4    | 152322 | 4.57 | 2.41E-06 | 1.03E-06 | 6.43E-01 |
| 5243      | ABCB1     | 7  | 87133179  | 87342639  | 419  | 152293 | 4.79 | 8.28E-07 | 1.05E-06 | 2.35E-01 |
| 56137     | PCDHA12   | 5  | 140254931 | 140391929 | 295  | 152216 | 4.81 | 7.74E-07 | 1.06E-06 | 2.13E-01 |
| 28992     | MACROD1   | 11 | 63766006  | 63933602  | 380  | 152205 | 4.69 | 1.37E-06 | 1.08E-06 | 4.05E-01 |
| 10279     | PRSS16    | 6  | 27215480  | 27224399  | 20   | 152273 | 4.87 | 5.72E-07 | 1.09E-06 | 1.32E-01 |
| 4665      | NAB2      | 12 | 57482677  | 57489259  | 11   | 152158 | 4.55 | 2.69E-06 | 1.13E-06 | 6.57E-01 |
| 56141     | PCDHA7    | 5  | 140213969 | 140391929 | 368  | 152179 | 4.75 | 1.00E-06 | 1.14E-06 | 2.70E-01 |
| 2309      | FOXO3     | 6  | 108881026 | 109005972 | 165  | 152252 | 4.57 | 2.42E-06 | 1.17E-06 | 6.02E-01 |
| 115708    | TRMT61A   | 14 | 103995509 | 104003410 | 19   | 152291 | 4.70 | 1.29E-06 | 1.21E-06 | 3.39E-01 |
| 137994    | LETM2     | 8  | 38240041  | 38267045  | 37   | 152185 | 4.78 | 8.66E-07 | 1.21E-06 | 2.07E-01 |
| 100507679 | MUC22     | 6  | 30973729  | 31003179  | 475  | 152233 | 4.96 | 3.56E-07 | 1.22E-06 | 4.50E-02 |
| 2272      | FHIT      | 3  | 59735036  | 61237133  | 6531 | 152250 | 4.94 | 3.83E-07 | 1.26E-06 | 4.90E-02 |
| 158293    | FAM120AOS | 9  | 96208776  | 96215874  | 23   | 152255 | 4.66 | 1.56E-06 | 1.27E-06 | 3.93E-01 |
| 6046      | BRD2      | 6  | 32936437  | 32949282  | 102  | 152351 | 4.58 | 2.32E-06 | 1.32E-06 | 5.35E-01 |
| 283129    | C11orf85  | 11 | 64705702  | 64739565  | 93   | 152323 | 4.71 | 1.22E-06 | 1.33E-06 | 2.85E-01 |
| 9745      | ZNF536    | 19 | 30863328  | 31048966  | 434  | 152100 | 4.72 | 1.20E-06 | 1.36E-06 | 2.74E-01 |
| 3118      | HLA-DQA2  | 6  | 32709156  | 32714664  | 77   | 152306 | 5.16 | 1.23E-07 | 1.37E-06 | 2.54E-03 |
| 56142     | PCDHA6    | 5  | 140207650 | 140391929 | 379  | 152184 | 4.70 | 1.30E-06 | 1.43E-06 | 2.83E-01 |
| 7738      | ZNF184    | 6  | 27418521  | 27440897  | 89   | 152326 | 4.81 | 7.54E-07 | 1.44E-06 | 1.31E-01 |
| 1500      | CTNND1    | 11 | 57520756  | 57586652  | 84   | 152175 | 5.23 | 8.37E-08 | 1.53E-06 | 5.16E-04 |
| 4325      | MMP16     | 8  | 89049460  | 89339717  | 678  | 152208 | 5.00 | 2.94E-07 | 1.54E-06 | 1.74E-02 |
| 56140     | PCDHA8    | 5  | 140220907 | 140391929 | 358  | 152176 | 4.70 | 1.33E-06 | 1.58E-06 | 2.58E-01 |
| 166336    | PRICKLE2  | 3  | 64079526  | 64253859  | 562  | 152246 | 4.57 | 2.44E-06 | 1.58E-06 | 4.87E-01 |
| 58506     | SCAF1     | 19 | 50145382  | 50161906  | 18   | 151947 | 4.67 | 1.48E-06 | 1.59E-06 | 2.96E-01 |

|              |                |           |                 |                 |             |               |             |                 |                 |                 |
|--------------|----------------|-----------|-----------------|-----------------|-------------|---------------|-------------|-----------------|-----------------|-----------------|
| 5094         | PCBP2          | 12        | 53845886        | 53874946        | 28          | 152197        | 4.66        | 1.61E-06        | 1.63E-06        | 3.14E-01        |
| 2066         | ERBB4          | 2         | 212240442       | 213403879       | 4442        | 152215        | 4.71        | 1.24E-06        | 1.67E-06        | 2.18E-01        |
| 144348       | ZNF664         | 12        | 124457699       | 124499986       | 79          | 152238        | 4.81        | 7.47E-07        | 1.71E-06        | 9.62E-02        |
| 54904        | WHSC1L1        | 8         | 38127217        | 38239872        | 124         | 152193        | 4.77        | 9.14E-07        | 1.73E-06        | 1.32E-01        |
| 6892         | TAPBP          | 6         | 33267471        | 33282164        | 38          | 152184        | 4.75        | 1.03E-06        | 1.77E-06        | 1.53E-01        |
| 80309        | SPHKAP         | 2         | 228844670       | 229046836       | 722         | 152265        | 4.73        | 1.13E-06        | 1.80E-06        | 1.73E-01        |
| 2590         | GALNT2         | 1         | 230202956       | 230417875       | 797         | 152134        | 4.82        | 7.25E-07        | 1.86E-06        | 7.71E-02        |
| 51107        | APH1A          | 1         | 150237799       | 150241609       | 2           | 152317        | 4.88        | 5.23E-07        | 1.94E-06        | 3.77E-02        |
| 23248        | RPRD2          | 1         | 150336624       | 150449042       | 359         | 152289        | 4.65        | 1.69E-06        | 1.96E-06        | 2.65E-01        |
| 56138        | PCDHA11        | 5         | 140247149       | 140391932       | 306         | 152221        | 4.67        | 1.48E-06        | 2.04E-06        | 2.13E-01        |
| 1800         | DPEP1          | 16        | 89679716        | 89707216        | 91          | 151997        | 4.77        | 9.15E-07        | 2.07E-06        | 9.65E-02        |
| 9779         | TBC1D5         | 3         | 17198654        | 17784240        | 1332        | 152288        | 4.90        | 4.80E-07        | 2.09E-06        | 2.65E-02        |
| 9509         | ADAMTS2        | 5         | 178537852       | 178772431       | 892         | 152056        | 4.81        | 7.40E-07        | 2.11E-06        | 6.26E-02        |
| 346007       | EYS            | 6         | 64429876        | 66417118        | 6079        | 152260        | 5.06        | 2.05E-07        | 2.18E-06        | 2.61E-03        |
| 5639         | PRRG2          | 19        | 50084574        | 50094272        | 30          | 152248        | 4.68        | 1.42E-06        | 2.21E-06        | 1.78E-01        |
| 23113        | CUL9           | 6         | 43149913        | 43192325        | 85          | 152219        | 4.57        | 2.42E-06        | 2.36E-06        | 3.29E-01        |
| 54970        | TTC12          | 11        | 113185251       | 113244345       | 121         | 152272        | 4.67        | 1.51E-06        | 2.57E-06        | 1.56E-01        |
| 29982        | NRBF2          | 10        | 64893007        | 64914786        | 44          | 152205        | 4.70        | 1.30E-06        | 2.61E-06        | 1.19E-01        |
| 51168        | MYO15A         | 17        | 18012020        | 18083116        | 133         | 152236        | 4.72        | 1.15E-06        | 2.66E-06        | 9.38E-02        |
| 154215       | NKAIN2         | 6         | 124124991       | 125146786       | 2818        | 152190        | 4.57        | 2.46E-06        | 2.70E-06        | 2.89E-01        |
| 5142         | PDE4B          | 1         | 66258193        | 66840262        | 1485        | 152185        | 4.75        | 1.00E-06        | 2.76E-06        | 6.70E-02        |
| 5929         | RBBP5          | 1         | 205055270       | 205091150       | 107         | 152263        | 4.58        | 2.32E-06        | 2.82E-06        | 2.53E-01        |
| 84513        | PPAPDC1B       | 8         | 38119035        | 38126841        | 8           | 152264        | 4.68        | 1.41E-06        | 2.90E-06        | 1.14E-01        |
| 259197       | NCR3           | 6         | 31556660        | 31560762        | 24          | 152208        | 4.62        | 1.90E-06        | 2.91E-06        | 1.83E-01        |
| 6911         | TBX6           | 16        | 30097114        | 30103258        | 9           | 151883        | 4.62        | 1.90E-06        | 3.27E-06        | 1.53E-01        |
| 1385         | CREB1          | 2         | 208394616       | 208470284       | 113         | 152209        | 4.71        | 1.27E-06        | 3.28E-06        | 7.51E-02        |
| <b>29123</b> | <b>ANKRD11</b> | <b>16</b> | <b>89334029</b> | <b>89556969</b> | <b>446</b>  | <b>152096</b> | <b>4.77</b> | <b>9.02E-07</b> | <b>3.32E-06</b> | <b>3.60E-02</b> |
| <b>55604</b> | <b>LRRC16A</b> | <b>6</b>  | <b>25279656</b> | <b>25620758</b> | <b>1503</b> | <b>152313</b> | <b>4.78</b> | <b>8.95E-07</b> | <b>3.42E-06</b> | <b>3.40E-02</b> |
| 83596        | BCL2L12        | 19        | 50168399        | 50177173        | 9           | 152072        | 4.56        | 2.52E-06        | 3.50E-06        | 2.12E-01        |
| 9277         | WDR46          | 6         | 33246682        | 33257304        | 34          | 152271        | 4.75        | 1.01E-06        | 3.79E-06        | 3.50E-02        |
| 83723        | FAM57B         | 16        | 30035748        | 30064338        | 50          | 152188        | 4.65        | 1.67E-06        | 3.92E-06        | 8.93E-02        |
| 64786        | TBC1D15        | 12        | 72233487        | 72320629        | 183         | 152276        | 4.58        | 2.29E-06        | 4.19E-06        | 1.38E-01        |
| 162494       | RHBDL3         | 17        | 30593195        | 30651680        | 191         | 152061        | 4.75        | 1.02E-06        | 4.57E-06        | 2.17E-02        |

|             |                 |          |                 |                 |           |               |             |                 |                 |                 |
|-------------|-----------------|----------|-----------------|-----------------|-----------|---------------|-------------|-----------------|-----------------|-----------------|
| 84138       | SLC7A6OS        | 16       | 68318043        | 68344868        | 42        | 152256        | 4.76        | 9.57E-07        | 4.92E-06        | 1.62E-02        |
| 1687        | DFNA5           | 7        | 24737974        | 24797639        | 244       | 152294        | 4.55        | 2.64E-06        | 6.50E-06        | 8.10E-02        |
| 9057        | SLC7A6          | 16       | 68298419        | 68335726        | 59        | 152231        | 4.68        | 1.46E-06        | 6.52E-06        | 2.22E-02        |
| 2903        | GRIN2A          | 16       | 9847265         | 10276611        | 1812      | 152285        | 4.73        | 1.13E-06        | 6.90E-06        | 1.00E-02        |
| 1182        |                 | 4        | 170541672       | 170644338       | 230       | 152267        | 4.55        | 2.75E-06        | 7.55E-06        | 6.47E-02        |
| 2011        | MARK2           | 11       | 63606400        | 63678492        | 117       | 152126        | 4.57        | 2.48E-06        | 7.97E-06        | 4.54E-02        |
| 226         | ALDOA           | 16       | 30064411        | 30081741        | 12        | 152159        | 4.62        | 1.95E-06        | 8.88E-06        | 1.99E-02        |
| 9856        | KIAA0319        | 6        | 24544332        | 24646383        | 396       | 152254        | 4.57        | 2.39E-06        | 1.01E-05        | 2.43E-02        |
| 389084      | C2orf82         | 2        | 233733724       | 233741111       | 23        | 152338        | 4.61        | 2.04E-06        | 1.06E-05        | 1.44E-02        |
| 79153       | GDPD3           | 16       | 30115977        | 30125264        | 17        | 151947        | 4.56        | 2.50E-06        | 1.26E-05        | 1.40E-02        |
| <b>3120</b> | <b>HLA-DQB2</b> | <b>6</b> | <b>32723837</b> | <b>32731330</b> | <b>62</b> | <b>152224</b> | <b>4.68</b> | <b>1.45E-06</b> | <b>1.57E-05</b> | <b>1.51E-03</b> |

\*Gene coordinates based on GRCh37/hg19. NSNPs: Number of SNPs per region included in the gene-based analysis. N: Number of individuals considered in the analysis. ZSTAT: the Z-value for the gene. Combined P: p-value obtained in the gene-based meta-analysis of cocaine dependence and SCZ. P SCZ/COCA: p-value of the gene-based in SCZ/COCA sample alone. In bold, new associated genes.
